# Supplementary material for: Multivariable logistic and linear regression models for identification of clinically useful biomarkers for osteoarthritis
Source: PubMed Central journal article supplement (PMC7347626; doi:10.1038/s41598-020-68077-0), 2020-07-09
Supplement: 41598_2020_68077_MOESM1_ESM.pdf [file 41598_2020_68077_MOESM1_ESM.pdf]

## **Supplementary Dataset**

### **Clinically useful biomarker in osteoarthritis (OA): urinary CTXII is the best-qualified marker for evaluation of OA?**

Yulia Liem<sup>1</sup>, Andy Judge<sup>1</sup>, John Kirwan<sup>2</sup>, Khadija Ourradi<sup>1</sup>, Yunfei Li<sup>1</sup> and Mohammed Sharif<sup>1\*</sup>

#### **Corresponding Author:**

\*Dr Mohammed Sharif

Translational Health Sciences

Bristol Medical School

Musculoskeletal Research Unit

University of Bristol

Learning and Research Building (Level 2)

Southmead Hospital

Bristol

BS10 5NB

United Kingdom

Contact: +44 (0) 117 41 47926, Email: [mo.sharif@bristol.ac.uk](mailto:mo.sharif@bristol.ac.uk)

#### **Affiliations:**

<sup>1</sup>Translational Health Science, Bristol Medical School, Musculoskeletal Research Unit, Learning & Research, Southmead Hospital, University of Bristol, Bristol, United Kingdom

<sup>2</sup>Emeritus Professor at University of Bristol

| <b>Age</b>               | <b>Frequencies</b> | <b>Percentage (%)</b> |
|--------------------------|--------------------|-----------------------|
| 40 - 50                  | 510                | 11.36                 |
| 50 - 60                  | 1566               | 34.87                 |
| 60 - 70                  | 1369               | 30.48                 |
| 70 - 80                  | 1046               | 23.29                 |
| <b>Total</b>             | <b>4491</b>        | <b>100</b>            |
| <b>Gender</b>            | <b>Frequencies</b> | <b>Percentage (%)</b> |
| Male                     | 1881               | 41.88                 |
| Female                   | 2610               | 58.12                 |
| <b>Total</b>             | <b>4491</b>        | <b>100</b>            |
| <b>Race</b>              | <b>Frequencies</b> | <b>Percentage (%)</b> |
| White / Caucasian        | 3600               | 80.16                 |
| Black / African American | 780                | 17.37                 |
| Asian                    | 38                 | 0.85                  |
| Others                   | 69                 | 1.54                  |
| Missing                  | 4                  | 0.09                  |
| <b>Total</b>             | <b>4491</b>        | <b>100</b>            |
| <b>Body Mass Index</b>   | <b>Frequencies</b> | <b>Percentage (%)</b> |
| Underweight              | 11                 | 0.24                  |
| Normal                   | 1069               | 23.8                  |
| Overweight               | 1764               | 39.28                 |
| Class I Obese            | 1178               | 26.23                 |
| Class II Obese           | 392                | 8.73                  |
| Class II Obese           | 77                 | 1.71                  |
| <b>Total</b>             | <b>4491</b>        | <b>100</b>            |

**Supplementary table 1.** Demographics data of the entire OAI cohort

| Biomarkers |             | Serum   |         |         |         |             |         |         |               |         |         |         | Urine         |         |         |               |               |           |             |            |
|------------|-------------|---------|---------|---------|---------|-------------|---------|---------|---------------|---------|---------|---------|---------------|---------|---------|---------------|---------------|-----------|-------------|------------|
|            |             | C12C    | C2C     | CPII    | PIIANP  | Coll2-1 NO2 | CS846   | MMP3    | CTXI          | COMP    | HA      | NTXI    | CTXII         | C12C    | C2C     | NTXI          | CTX1 alpha    | CTX1 beta | Coll2-1 NO2 | Creatinine |
| Serum      | C12C        | 1-0000  |         |         |         |             |         |         |               |         |         |         |               |         |         |               |               |           |             |            |
|            | C2C         | 0-4028  | 1-0000  |         |         |             |         |         |               |         |         |         |               |         |         |               |               |           |             |            |
|            | CPII        | 0-3880  | 0-3772  | 1-0000  |         |             |         |         |               |         |         |         |               |         |         |               |               |           |             |            |
|            | PIIANP      | 0-0849  | 0-1239  | 0-0715  | 1-0000  |             |         |         |               |         |         |         |               |         |         |               |               |           |             |            |
|            | Coll2-1 NO2 | 0-2812  | 0-3547  | 0-3783  | -0-0249 | 1-0000      |         |         |               |         |         |         |               |         |         |               |               |           |             |            |
|            | CS846       | 0-0052  | -0-0029 | -0-0477 | -0-0644 | 0-0047      | 1-0000  |         |               |         |         |         |               |         |         |               |               |           |             |            |
|            | MMP3        | -0-0280 | -0-2263 | -0-2100 | -0-1038 | -0-1641     | -0-0250 | 1-0000  |               |         |         |         |               |         |         |               |               |           |             |            |
|            | CTXI        | 0-0599  | 0-0219  | -0-0232 | 0-0099  | -0-0005     | 0-1719  | -0-0517 | 1-0000        |         |         |         |               |         |         |               |               |           |             |            |
|            | COMP        | 0-0913  | 0-1218  | 0-1248  | 0-0720  | 0-0848      | -0-0170 | 0-1963  | 0-0475        | 1-0000  |         |         |               |         |         |               |               |           |             |            |
|            | HA          | 0-0653  | 0-0570  | 0-0099  | -0-0598 | 0-0391      | -0-0618 | 0-1316  | 0-0696        | 0-2707  | 1-0000  |         |               |         |         |               |               |           |             |            |
| NTXI       | -0-1154     | -0-0869 | -0-0508 | 0-0170  | 0-0402  | 0-1082      | -0-0131 | 0-6108  | 0-0938        | 0-1200  | 1-0000  |         |               |         |         |               |               |           |             |            |
| Urine      | CTXII       | 0-1244  | 0-1637  | 0-0756  | 0-0773  | 0-1690      | -0-0728 | -0-1627 | 0-3026        | 0-1043  | 0-3274  | 0-2254  | 1-0000        |         |         |               |               |           |             |            |
|            | C12C        | -0-0378 | 0-0577  | -0-0562 | -0-1576 | 0-0072      | 0-0432  | -0-0189 | -0-0751       | 0-0053  | -0-0284 | -0-1021 | -0-0272       | 1-0000  |         |               |               |           |             |            |
|            | C2C         | 0-1332  | 0-1241  | 0-0559  | 0-0671  | 0-1220      | -0-0454 | -0-0323 | 0-1173        | 0-1389  | 0-4113  | 0-1072  | <b>0-6991</b> | -0-0263 | 1-0000  |               |               |           |             |            |
|            | NTXI        | 0-0586  | 0-0880  | -0-0153 | -0-0133 | 0-0719      | 0-1330  | -0-2207 | <b>0-7474</b> | -0-0187 | 0-1099  | 0-4949  | 0-4113        | 0-1359  | 0-2815  | 1-0000        |               |           |             |            |
|            | CTX1 alpha  | 0-0783  | 0-1069  | 0-0303  | 0-0330  | 0-0605      | 0-1570  | -0-1768 | <b>0-8210</b> | -0-0270 | 0-1009  | 0-5364  | 0-4190        | 0-0089  | 0-2739  | <b>0-8661</b> | 1-0000        |           |             |            |
|            | CTX1 beta   | 0-0563  | 0-0602  | -0-0335 | 0-0083  | 0-0437      | 0-1891  | -0-2118 | <b>0-8230</b> | -0-0816 | 0-0255  | 0-5058  | 0-3203        | 0-0834  | 0-1452  | <b>0-8586</b> | <b>0-8991</b> | 1-0000    |             |            |
|            | Coll2-1 NO2 | 0-0683  | 0-0190  | 0-0871  | -0-0689 | -0-0318     | -0-0947 | -0-0573 | -0-0597       | 0-0832  | 0-0790  | -0-0758 | 0-1007        | 0-3069  | 0-1674  | 0-1526        | -0-0004       | 0-0262    | 1-0000      |            |
| Creatinine | -0-0940     | -0-0139 | -0-1245 | -0-0467 | -0-0955 | 0-0653      | 0-0985  | 0-0645  | 0-0338        | -0-0359 | 0-0223  | -0-0523 | 0-2843        | -0-2706 | -0-1185 | -0-0749       | 0-0310        | -0-0812   | 1-0000      |            |

Supplementary table 2: Spearman correlations between biomarkers for checking collinearity at baseline.

| Univariate models (K&L grade) |                                |              |              |                                |              |              |                                |              |              |
|-------------------------------|--------------------------------|--------------|--------------|--------------------------------|--------------|--------------|--------------------------------|--------------|--------------|
| N=300 - 600                   | Baseline                       |              |              | 12 Months                      |              |              | 24 Months                      |              |              |
|                               | Odd Ratio (95% CI)             | P value      | AUC          | Odd Ratio (95% CI)             | P value      | AUC          | Odd Ratio (95% CI)             | P value      | AUC          |
| Serum C12C                    | 1.0040 (0.9841, 1.0244)        | 0.696        | 0.506        | 0.9957 (0.9754, 1.0164)        | 0.679        | 0.536        | 0.9974 (0.9760, 1.0192)        | 0.813        | 0.498        |
| Serum C2C                     | <b>1.0075 (1.0009, 1.0142)</b> | <b>0.025</b> | <b>0.597</b> | 1.0019 (0.9949, 1.0089)        | 0.601        | 0.511        | 0.9999 (0.9934, 1.0064)        | 0.972        | 0.522        |
| Serum CPII                    | <b>1.0012 (1.0002, 1.0022)</b> | <b>0.024</b> | <b>0.599</b> | 1.0000 (0.9990, 1.0010)        | 0.949        | 0.486        | 1.0003 (0.9993, 1.0013)        | 0.569        | 0.528        |
| Serum PIIANP                  | 1.0003 (0.9999, 1.0007)        | 0.150        | 0.569        | 1.0004 (0.9999, 1.0009)        | 0.094        | 0.578        | 1.0115 (0.9508, 1.0761)        | 0.718        | 0.505        |
| Serum Coll21NO2               | <b>1.1054 (1.0246, 1.1926)</b> | <b>0.010</b> | <b>0.607</b> | 1.0563 (0.9778, 1.1412)        | 0.165        | 0.558        | 1.0115 (0.9508, 1.0761)        | 0.718        | 0.487        |
| Serum CS846                   | 0.9989 (0.9939, 1.0039)        | 0.660        | 0.507        | 0.9978 (0.9926, 1.0029)        | 0.392        | 0.587        | 0.9997 (0.9938, 1.0056)        | 0.920        | 0.511        |
| Serum MMP3                    | 0.9968 (0.9762, 1.0177)        | 0.759        | 0.521        | 1.0111 (0.9776, 1.0458)        | 0.520        | 0.520        | 1.0019 (0.9733, 1.0313)        | 0.899        | 0.486        |
| Serum CTXI                    | 0.9995 (0.9982, 1.0009)        | 0.506        | 0.492        | <b>0.9984 (0.997, 0.9998)</b>  | <b>0.029</b> | <b>0.550</b> | 0.9989 (0.9975, 1.0003)        | 0.133        | 0.546        |
| Serum COMP                    | 0.9998 (0.9988, 1.0007)        | 0.651        | 0.513        | 1.0002 (0.9991, 1.0012)        | 0.770        | 0.518        | 0.9999 (0.9988, 1.0009)        | 0.808        | 0.499        |
| Serum HA                      | <b>1.0114 (1.0002, 1.0228)</b> | <b>0.046</b> | <b>0.623</b> | <b>1.0155 (1.0012, 1.0299)</b> | <b>0.034</b> | <b>0.630</b> | <b>1.0184 (1.0035, 1.0335)</b> | <b>0.015</b> | <b>0.656</b> |
| Serum NTXI                    | 0.9872 (0.9369, 1.0401)        | 0.628        | 0.502        | 1.0301 (0.9586, 1.107)         | 0.419        | 0.534        | 1.0284 (0.9580, 1.1039)        | 0.440        | 0.545        |
| Urine CTXII                   | <b>1.0317 (1.0090, 1.0550)</b> | <b>0.006</b> | <b>0.671</b> | 1.0225 (0.9996, 1.0458)        | 0.054        | 0.635        | <b>1.0335 (1.0070, 1.0607)</b> | <b>0.013</b> | <b>0.655</b> |
| Urine C12C                    | 1.1367 (0.8600, 1.5024)        | 0.368        | 0.546        | 1.3294 (0.9633, 1.8347)        | 0.083        | 0.574        | 1.1437 (0.8240, 1.5875)        | 0.422        | 0.536        |
| Urine C2C                     | 1.0012 (0.9980, 1.0043)        | 0.475        | 0.591        | 1.0030 (0.9987, 1.0073)        | 0.173        | 0.614        | <b>1.0074 (1.0022, 1.0126)</b> | <b>0.005</b> | <b>0.649</b> |
| Urine NTXI                    | 1.0003 (0.9832, 1.0177)        | 0.970        | 0.519        | 0.9895 (0.9739, 1.0054)        | 0.194        | 0.494        | 0.9938 (0.9727, 1.0154)        | 0.573        | 0.493        |
| Urine CTX1alpha               | 0.9996 (0.9989, 1.0003)        | 0.240        | 0.479        | 0.9996 (0.9987, 1.0005)        | 0.365        | 0.475        | 0.9996 (0.9985, 1.0006)        | 0.444        | 0.481        |
| Urine CTX1beta                | 0.9999 (0.9998, 1.0001)        | 0.379        | 0.532        | 0.9999 (0.9997, 1.0000)        | 0.138        | 0.524        | 0.9999 (0.9997, 1.0001)        | 0.456        | 0.510        |
| Urine Coll21NO2               | 0.9981 (0.9735, 1.0234)        | 0.885        | 0.456        | 0.9846 (0.9693, 1.0002)        | 0.053        | 0.607        | 0.9980 (0.9696, 1.0272)        | 0.891        | 0.442        |
| Urine Creatinine              | 1.0369 (0.9749, 1.1029)        | 0.250        | 0.554        | 1.0374 (0.9703, 1.1091)        | 0.282        | 0.538        | 1.0439 (0.9687, 1.1250)        | 0.260        | 0.561        |

**Supplementary table 3** Univariate logistic regression model for biomarker associations with KL grade at Baseline, 12 months and 24 months. Unit of measurements of some biomarkers (serum C12C, COMP, CTXI and urinary CTXII, C12C, Coll2-1 NO2, CTXII alpha and beta) were adjusted to the power of 10, 100, 1000 and logarithmically

| Adjusted Multivariate (K&L grade) |                                |              |        |                                   |              |        |                                   |              |        |
|-----------------------------------|--------------------------------|--------------|--------|-----------------------------------|--------------|--------|-----------------------------------|--------------|--------|
| n=546                             | Baseline                       |              |        | 12 Months                         |              |        | 24 Month:                         |              |        |
|                                   | Odd Ratio (95% CI)             | P value      | AUC    | Odd Ratio (95% CI)                | P value      | AUC    | Odd Ratio (95% CI)                | P value      | AUC    |
| Serum C12C                        | 0.9812 (0.954, 1.0093)         | 0.187        |        | 0.97976 (0.95078, 1.00963)        | 0.182        |        | 0.97103 (0.93788, 1.00536)        | 0.097        |        |
| Serum C2C                         | 1.0048 (0.996, 1.0137)         | 0.282        |        | 1.00126 (0.99153, 1.01109)        | 0.801        |        | 1.00486 (0.99401, 1.01581)        | 0.382        |        |
| Serum CPII                        | 1.0008 (0.9994, 1.0022)        | 0.275        |        | 1.00005 (0.99874, 1.00136)        | 0.943        |        | 1.00104 (0.99925, 1.00282)        | 0.255        |        |
| Serum PIIANP                      | 1.0003 (0.9998, 1.0007)        | 0.257        |        | 1.00038 (0.99987, 1.00090)        | 0.145        |        | 1.00016 (0.99961, 1.00071)        | 0.563        |        |
| Serum Coll21NO2                   | <b>1.1340 (1.0298, 1.2488)</b> | <b>0.011</b> |        | 1.09907 (0.98637, 1.22464)        | 0.087        |        | <b>1.12359 (1.00045, 1.26188)</b> | <b>0.049</b> |        |
| Serum CS846                       | 0.9977 (0.9917, 1.0038)        | 0.462        |        | 0.99723 (0.9909, 1.00361)         | 0.394        |        | 0.99568 (0.98885, 1.00255)        | 0.217        |        |
| Serum MMP3                        | 0.9982 (0.9728, 1.0243)        | 0.894        |        | 0.99743 (0.95914, 1.03725)        | 0.898        |        | 0.99642 (0.96548, 1.02834)        | 0.823        |        |
| Serum CTXI                        | 1.0009 (0.9979, 1.0038)        | 0.566        |        | <b>0.99600 (0.99262, 0.99938)</b> | <b>0.020</b> |        | 1.00081 (0.99712, 1.00451)        | 0.668        |        |
| Serum COMP                        | <b>0.9987 (0.9976, 0.9999)</b> | <b>0.029</b> | 0.7980 | 0.99935 (0.99811, 1.00060)        | 0.311        | 0.7800 | <b>0.99829 (0.99695, 0.99963)</b> | <b>0.013</b> | 0.8234 |
| Serum HA                          | 1.0012 (0.9898, 1.0127)        | 0.84         |        | 1.01066 (0.99274, 1.02890)        | 0.246        |        | 1.01503 (0.99574, 1.03471)        | 0.128        |        |
| Serum NTXI                        | 0.9948 (0.9285, 1.0658)        | 0.882        |        | <b>1.13945 (1.00703, 1.28929)</b> | <b>0.038</b> |        | 1.01946 (0.92198, 1.12724)        | 0.707        |        |
| Urine CTXII                       | <b>1.0700 (1.0270, 1.1148)</b> | <b>0.001</b> |        | 1.01889 (0.98335, 1.05571)        | 0.302        |        | <b>1.06842 (1.01538, 1.12424)</b> | <b>0.011</b> |        |
| Urine C12C                        | 0.9731 (0.6612, 1.4322)        | 0.89         |        | 1.45672 (0.95100, 2.23136)        | 0.084        |        | 0.94022 (0.58042, 1.52308)        | 0.802        |        |
| Urine C2C                         | 0.9985 (0.9938, 1.0032)        | 0.528        |        | 1.00033 (0.99467, 1.00603)        | 0.909        |        | 0.99837 (0.99228, 1.00451)        | 0.602        |        |
| Urine NTXI                        | 1.0219 (0.9674, 1.0795)        | 0.439        |        | 0.97537 (0.93669, 1.01565)        | 0.227        |        | 1.03897 (0.96960, 1.11330)        | 0.278        |        |
| Urine CTX1alpha                   | 0.9985 (0.9960, 1.0010)        | 0.238        |        | 1.00192 (0.99924, 1.00460)        | 0.161        |        | 0.99799 (0.99477, 1.00123)        | 0.224        |        |
| Urine CTX1beta                    | 0.9998 (0.9995, 1.0002)        | 0.314        |        | 0.99989 (0.99948, 1.00031)        | 0.610        |        | 0.99966 (0.99921, 1.00011)        | 0.136        |        |
| Urine Creatinine                  | 1.0155 (0.9318, 1.1067)        | 0.726        |        | 0.98874 (0.90873, 1.07578)        | 0.792        |        | 0.98688 (0.89406, 1.08933)        | 0.793        |        |

**Supplementary table 4** Multivariate model for biomarker associations with KL grade at baseline, 12 months and 24 months. Unit of measurements of some biomarkers (serum C12C, COMP, CTXI and urinary CTXII, C12C, Coll21 NO2, CTXII alpha and beta) were adjusted to the power of 10, 100, 1000 and logarithmically transformed. The data was adjusted for age, BMI, gender and race. Urinary Coll2-1 NO2 was removed due to missing data.

| Final multivariate model (K&L grade) |                                |              |        |                                   |              |       |                                   |              |        |
|--------------------------------------|--------------------------------|--------------|--------|-----------------------------------|--------------|-------|-----------------------------------|--------------|--------|
| <i>n=547</i>                         | Baseline                       |              |        | 12 Months                         |              |       | 24 Months                         |              |        |
|                                      | Odd Ratio (95% CI)             | P value      | AUC    | Odd Ratio (95% CI)                | P value      | AUC   | Odd Ratio (95% CI)                | P value      | AUC    |
| Serum C12C                           | 0.9816 (0.9546, 1.0093)        | 0.191        | 0.7856 | 0.97930 (0.95108, 1.00835)        | 0.161        | 0.775 | 0.97174 (0.93924, 1.00535)        | 0.098        | 0.8052 |
| Serum C2C                            | 1.0036 (0.9951, 1.0121)        | 0.407        |        | 0.99983 (0.99074, 1.00899)        | 0.970        |       | 1.00285 (0.9925, 1.0133)          | 0.591        |        |
| Serum CPII                           | 1.0008 (0.9994, 1.0023)        | 0.254        |        | 0.99987 (0.9986, 1.00114)         | 0.837        |       | 1.00108 (0.99933, 1.00284)        | 0.227        |        |
| Serum PIIANP                         | 1.0003 (0.9998, 1.0007)        | 0.252        |        | 1.00041 (0.9999, 1.00092)         | 0.118        |       | 1.00019 (0.99965, 1.00074)        | 0.488        |        |
| Serum Coll21NO2                      | <b>1.1316 (1.0289, 1.2445)</b> | <b>0.011</b> |        | <b>1.11319 (1.00225, 1.23641)</b> | <b>0.045</b> |       | 1.11904 (0.99887, 1.25367)        | 0.052        |        |
| Serum CS846                          | 0.9972 (0.9913, 1.0032)        | 0.364        |        | 0.99818 (0.99203, 1.00437)        | 0.564        |       | 0.99531 (0.98865, 1.00201)        | 0.17         |        |
| Serum MMP3                           | 0.9992 (0.9737, 1.0253)        | 0.950        |        | 1.00051 (0.96272, 1.03978)        | 0.979        |       | 0.99938 (0.96843, 1.03133)        | 0.969        |        |
| Serum CTXI                           | 0.9996 (0.9971, 1.0021)        | 0.761        |        | 0.99813 (0.99569, 1.00057)        | 0.133        |       | 0.99929 (0.99627, 1.00232)        | 0.645        |        |
| Serum COMP                           | <b>0.9988 (0.9977, 0.9999)</b> | <b>0.036</b> |        | 0.99940 (0.99818, 1.00062)        | 0.335        |       | <b>0.99837 (0.99706, 0.99969)</b> | <b>0.015</b> |        |
| Serum HA                             | 1.0011 (0.9898, 1.0125)        | 0.851        |        | 1.00953 (0.99236, 1.02700)        | 0.279        |       | 1.01517 (0.99577, 1.03494)        | 0.126        |        |
| Urine CTXII                          | <b>1.0607 (1.0231, 1.0996)</b> | <b>0.001</b> |        | 1.02424 (0.99375, 1.05566)        | 0.120        |       | <b>1.05914 (1.01327, 1.1071)</b>  | <b>0.011</b> |        |
| Urine C12C                           | 0.9837 (0.6802, 1.4226)        | 0.930        |        | 1.34530 (0.8794, 2.05804)         | 0.171        |       | 0.94176 (0.59899, 1.48067)        | 0.795        |        |
| Urine NTXI                           | 0.9933 (0.9609, 1.0268)        | 0.691        |        | 0.99595 (0.96468, 1.02823)        | 0.803        |       | 0.9939 (0.9544, 1.03503)          | 0.767        |        |
| Urine Creatinine                     | 1.0208 (0.9381, 1.1107)        | 0.633        |        | 0.98596 (0.90896, 1.06949)        | 0.733        |       | 0.99452 (0.9024, 1.09604)         | 0.912        |        |

**Supplementary table 5.** Multivariate logistic regression model for biomarker associations with KL grade at baseline, 12 months and 24 months. Unit of measurements of some biomarkers (serum C12C, COMP, CTXI and urinary CTXII, C12C, Coll21 NO2, CTXII alpha and beta) were adjusted to the power of 10, 100, 1000 and logarithmically transformed. The data was adjusted for age, BMI, gender and race.
